# Supplementary material for: Delicate fabrication of ZnO/ZnCo2O4heterojunction HoMSs as anodes for lithium-ion batteries with high rate capability
Source: Royal Society of Chemistry journal article supplement (doi:10.1039/d2qm00688j), 2022-01-01
Supplement: d2qm00688j1.pdf [file d2qm00688j1.pdf]

## **Delicate fabrication of ZnO/ZnCo<sub>2</sub>O<sub>4</sub> heterojunction HoMS as anode for lithium-ion battery with high-rate capability**

Hui Zhang<sup>a</sup>, Xin Zhou<sup>a</sup>, Yahui Liu<sup>c</sup>, Baoxiu Hou<sup>a</sup>, Linlin Ma<sup>a</sup>, Yuan Liu<sup>a</sup>, Haiyan Liu<sup>a</sup>, Shuaihua Zhang<sup>a</sup>, Zhimin Ao<sup>e</sup>, Jianjun Song<sup>b\*</sup>, Jiangyan Wang<sup>d\*</sup>, Xiaoxian Zhao<sup>a\*</sup>

<sup>a</sup> *Department of Chemistry, College of Science, Hebei Agricultural University, Baoding, 071001, China.*

<sup>b</sup> *College of Physics, Qingdao University, Qingdao 266071, China.*

<sup>c</sup> *National Engineering Research Center of green recycling for strategic metal resources, Institute of Process Engineering, Chinese Academy of Sciences, Beijing 100190, China.*

<sup>d</sup> *State Key Laboratory of Biochemical Engineering, Institute of Process Engineering, Chinese Academy of Sciences, No. 1, Beierjie, Zhongguancun, Beijing, 100190, China.*

<sup>e</sup> *Guangdong-Hong Kong-Macao Joint Laboratory for Contaminants Exposure and Health, Guangzhou Key Laboratory Environmental Catalysis and Pollution Control, Institute of Environmental Health and Pollution Control, Guangdong University of Technology, Guangzhou 510006, China.*

E-mail: [lxzhxx@hebau.edu.cn](mailto:lxzhxx@hebau.edu.cn) (X. Zhao); [jywang@ipe.ac.cn](mailto:jywang@ipe.ac.cn) (J. Wang); [jianjun.song@qdu.edu.cn](mailto:jianjun.song@qdu.edu.cn) (J. Song)

## Supporting Information Caption

**Figure S1.** The TGA of ZnO/ZnCo<sub>2</sub>O<sub>4</sub> HoMS with different compositions.

**Figure S2.** The Fourier Transform Infrared Spectrometer (FTIR) of ZnO/ZnCo<sub>2</sub>O<sub>4</sub> HoMS with different compositions.

**Figure S3.** The XRD of ZnO/ZnCo<sub>2</sub>O<sub>4</sub> HoMS with different compositions.

**Figure S4.** The SEM of ZnO/ZnCo<sub>2</sub>O<sub>4</sub> D-HoMS-4/1 (a), Q-HoMS-3/1 (b), Q-HoMS-1/1 (c), Q-HoMS-1/2 (d), Qa-HoMS-1/3 (e) and T-HoMS-1/4 (f).

**Figure S5.** The TEM of ZnO/ZnCo<sub>2</sub>O<sub>4</sub> D-HoMS-4/1 (a), Q-HoMS-3/1 (b), Q-HoMS-1/1 (c), Q-HoMS-1/2 (d), Qa-HoMS-1/3 (e) and T-HoMS-1/4 (f).

**Figure S6.** The Zn2p XPS high-resolution analysis of ZnO/ZnCo<sub>2</sub>O<sub>4</sub> Q-HoMS-2/1.

**Figure S7.** The O1s XPS high-resolution analysis of ZnO/ZnCo<sub>2</sub>O<sub>4</sub> Q-HoMS-2/1 (O<sub>C</sub> is chemisorbed oxygen), O<sub>V</sub> is oxygen vacancies, O<sub>L</sub> is lattice oxygen).

**Figure S8.** The charge-discharge curves of ZnO/ZnCo<sub>2</sub>O<sub>4</sub> Q-HoMS-3/1 (a), Q-HoMS-2/1 (b), Q-HoMS-1/1 (c) and Q-HoMS-1/2 (d).

**Figure S9.** The cyclic voltammetry curves of ZnO/ZnCo<sub>2</sub>O<sub>4</sub> Q-HoMS-3/1 (a), Q-HoMS-2/1 (b), Q-HoMS-1/1 (c) and Q-HoMS-1/2 (d).

**Figure S10.** The BET curves of ZnO/ZnCo<sub>2</sub>O<sub>4</sub> Q-HoMS-3/1, Q-HoMS-2/1, Q-HoMS-1/1 and Q-HoMS-1/2.

**Figure S11.** The calculation results for capacitive contribution at 3 mV s<sup>-1</sup> scan rate of ZnO/ZnCo<sub>2</sub>O<sub>4</sub> Q-HoMS-3/1 (a), Q-HoMS-2/1 (b), Q-HoMS-1/1 (c) and Q-HoMS-1/2 (d).

**Figure S12.** The SEM of ZnO/ZnCo<sub>2</sub>O<sub>4</sub> S-HoMS-2/1 (a), D-HoMS-2/1 (b), T-HoMS-2/1 (c) and Qa-HoMS-2/1 (d).

**Figure S13.** The TEM of ZnO/ZnCo<sub>2</sub>O<sub>4</sub> S-HoMS-2/1 (a), D-HoMS-2/1 (b), T-HoMS-2/1 (c) and Qa-HoMS-2/1 (d).

**Figure S14.** The rate capability test of ZnO/ZnCo<sub>2</sub>O<sub>4</sub> S-HoMS-2/1, D-HoMS-2/1, T-HoMS-2/1 and Qa-HoMS-2/1.

**Figure S15.** The charge-discharge curves of ZnO/ZnCo<sub>2</sub>O<sub>4</sub> S-HoMS-2/1 (a), D-HoMS-2/1 (b), T-HoMS-2/1 (c) and Qa-HoMS-2/1 (d) at different current densities.

**Figure S16.** The cyclic voltammetry curves of ZnO/ZnCo<sub>2</sub>O<sub>4</sub> S-HoMS-2/1 (a), D-HoMS-2/1 (b), T-HoMS-2/1 (c) and Qa-HoMS-2/1 (d) at different scan rates.

**Figure S17.** The calculation results for capacitive contribution at 3 mV s<sup>-1</sup> scan rate of ZnO/ZnCo<sub>2</sub>O<sub>4</sub> S-HoMS-2/1 (a), D-HoMS-2/1 (b), T-HoMS-2/1 (c) and Qa-HoMS-2/1 (d).

**Figure S18.** The BET curves of ZnO/ZnCo<sub>2</sub>O<sub>4</sub> S-HoMS-2/1, D-HoMS-2/1, T-HoMS-2/1 and Qa-HoMS-2/1.

**Table S1.** The mass of cobalt acetate and zinc acetate added to the reaction.

**Table S2.** The preparing conditions of multi-shelled ZnO/ZnCo<sub>2</sub>O<sub>4</sub> Q-HoMS-2/1 hollow spheres.

**Table S3.** Cell parameters and occupied positions of refined ZnCo<sub>2</sub>O<sub>4</sub>.

**Table S4.** Cell parameters and occupied positions of refined ZnO.

**Table S5.** Two-phase proportion of ZnO and ZnCo<sub>2</sub>O<sub>4</sub> and all errors in the refined results.

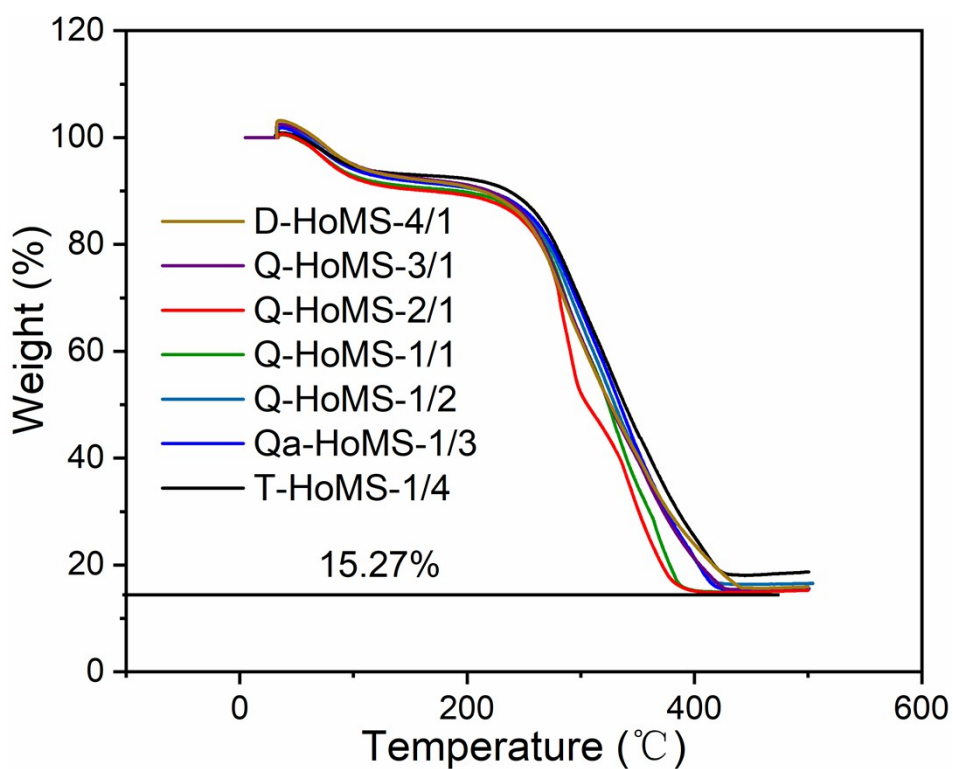

**Figure S1.** The TGA of ZnO/ZnCo<sub>2</sub>O<sub>4</sub> HoMS with different compositions.

The combustion rate of carbon sphere was increased first and then decreased with the increase of the molar ratio of Co/Zn.

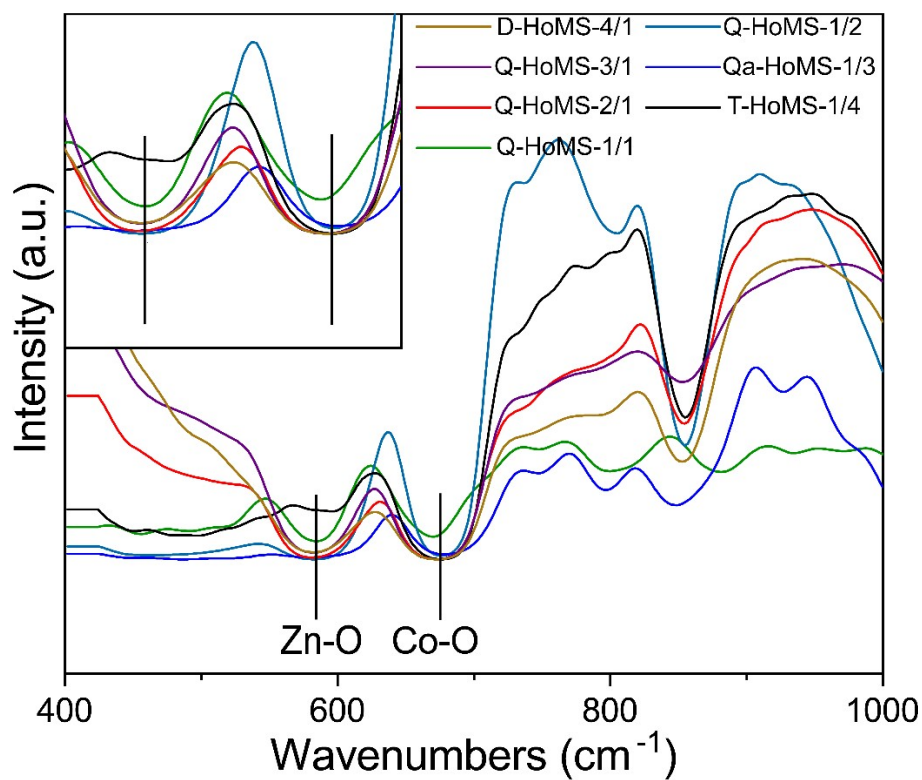

**Figure S2.** The Fourier Transform Infrared Spectrometer (FTIR) of ZnO/ZnCo<sub>2</sub>O<sub>4</sub> HoMS with different compositions.

With increasing molar ratio of Co/Zn, the peak position of Co-O bond corresponding to stretching vibration in Fourier Transform Infrared Spectrometer (FTIR) was decreased.

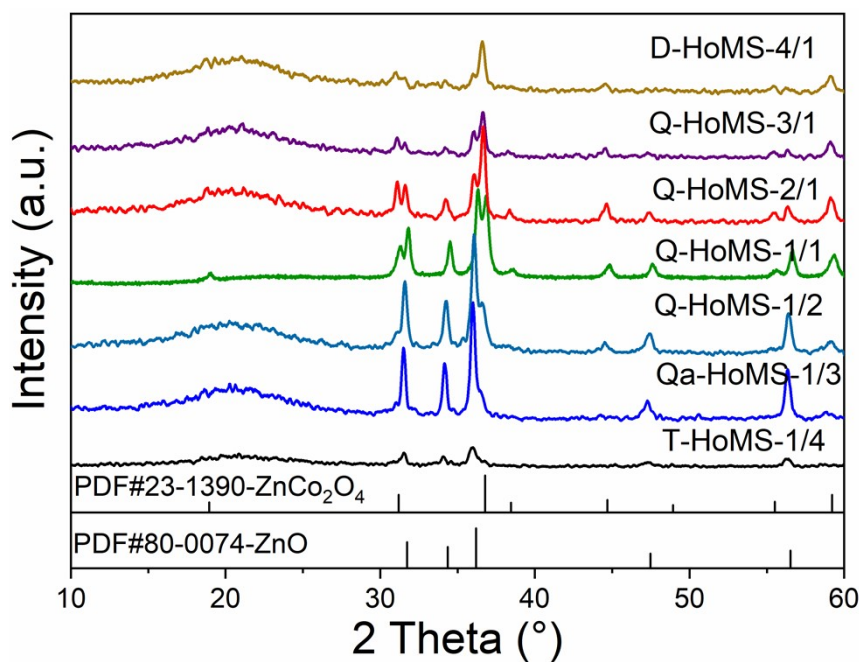

**Figure S3.** The XRD of ZnO/ZnCo<sub>2</sub>O<sub>4</sub> HoMS with different compositions.

With increasing molar ratio of Co/Zn, the peak intensity standing for ZnCo<sub>2</sub>O<sub>4</sub> in XRD was increased and the peak intensity corresponding to ZnO was decreased.

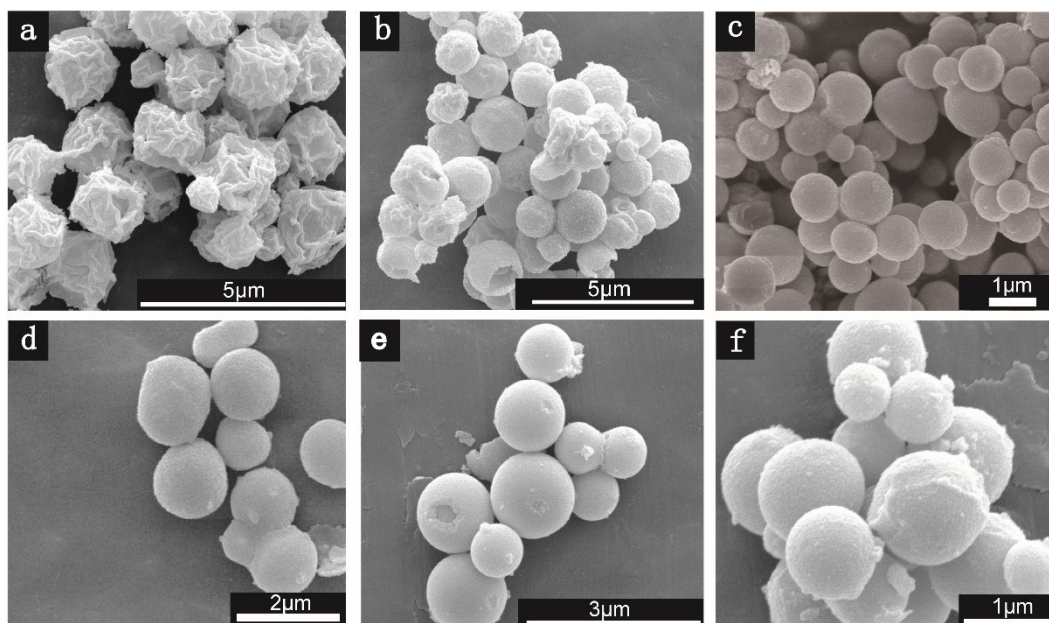

**Figure S4.** The SEM of ZnO/ZnCo<sub>2</sub>O<sub>4</sub> D-HoMS-4/1 (a), Q-HoMS-3/1 (b), Q-HoMS-1/1 (c), Q-HoMS-1/2 (d), Qa-HoMS-1/3 (e) and T-HoMS-1/4 (f).

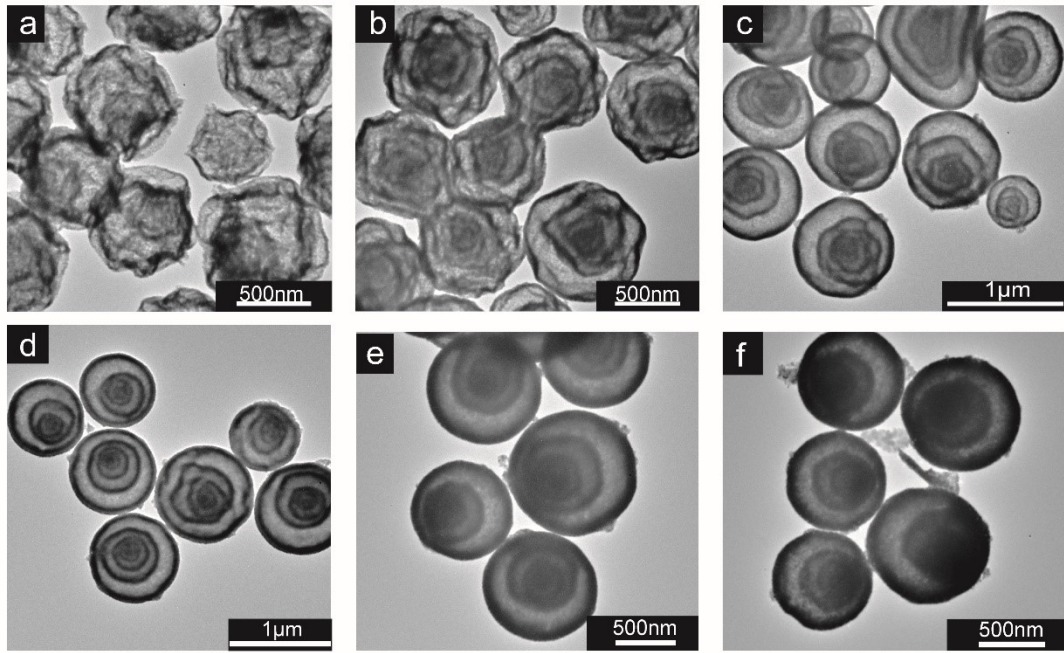

**Figure S5.** The TEM of ZnO/ZnCo<sub>2</sub>O<sub>4</sub> D-HoMS-4/1 (a), Q-HoMS-3/1 (b), Q-HoMS-1/1 (c), Q-HoMS-1/2 (d), Qa-HoMS-1/3 (e) and T-HoMS-1/4 (f).



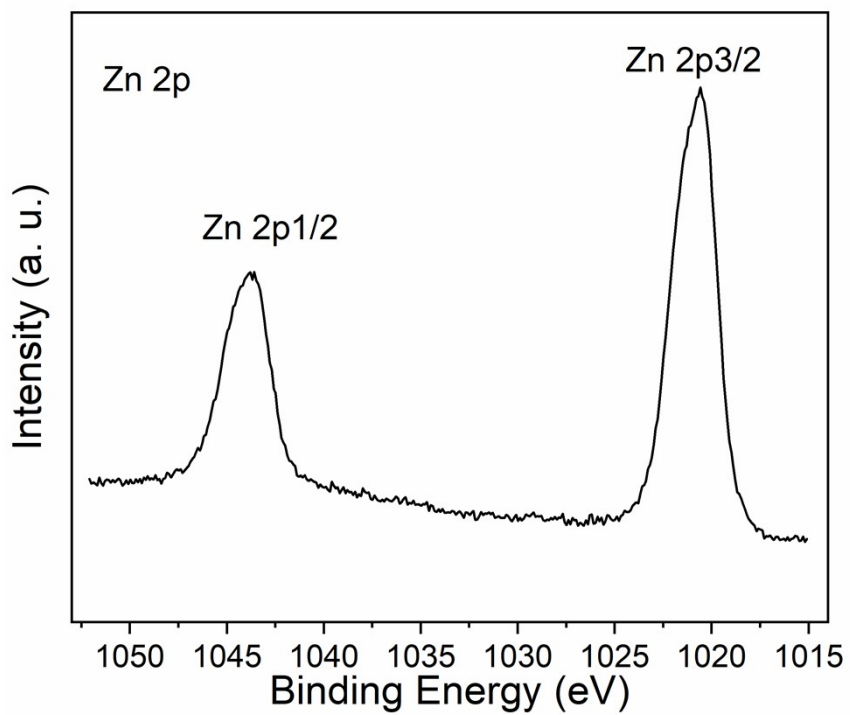

**Figure S6.** The Zn2p XPS high-resolution analysis of ZnO/ZnCo<sub>2</sub>O<sub>4</sub> Q-HoMS-2/1.

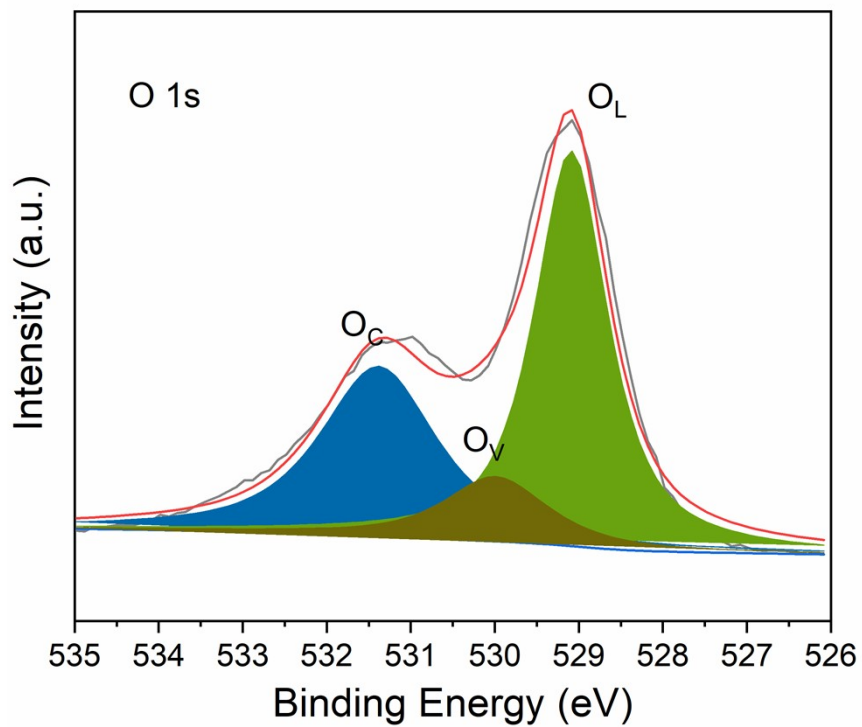

**Figure S7.** The O1s XPS high-resolution analysis of ZnO/ZnCo<sub>2</sub>O<sub>4</sub> Q-HoMS-2/1 ( $O_C$  is chemisorbed oxygen),  $O_V$  is oxygen vacancies,  $O_L$  is lattice oxygen).

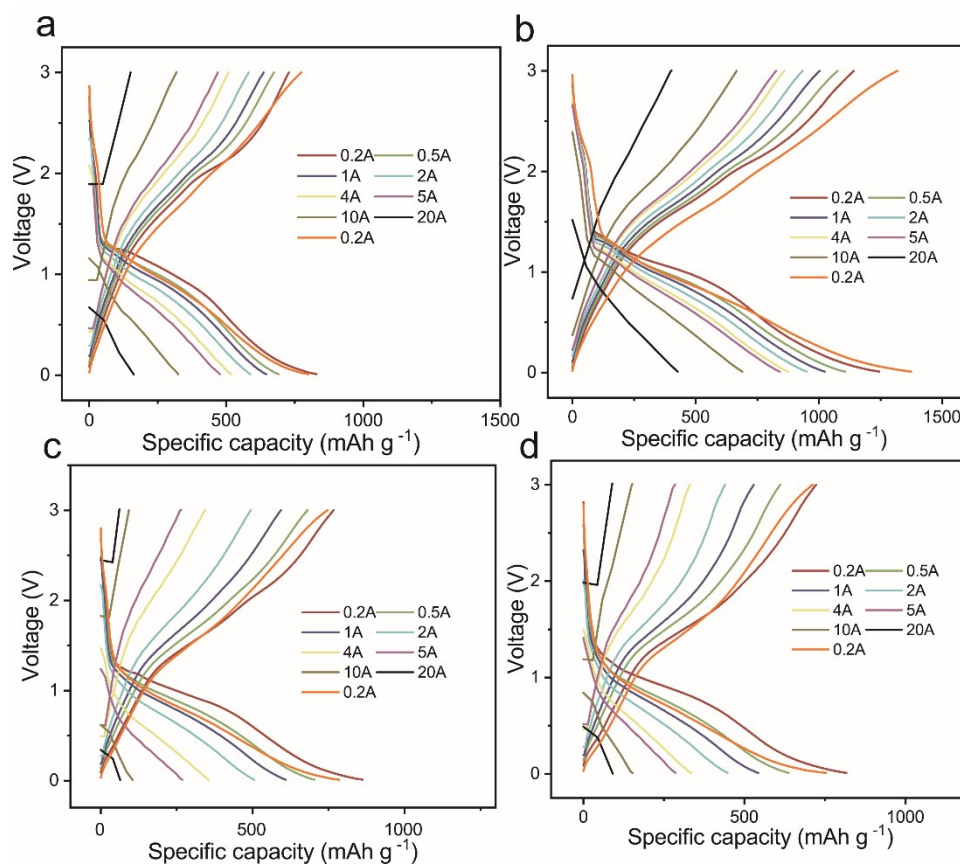

**Figure S8.** The charge-discharge curves of ZnO/ZnCo<sub>2</sub>O<sub>4</sub> Q-HoMS-3/1 (a), Q-HoMS-2/1 (b), Q-HoMS-1/1 (c) and Q-HoMS-1/2 (d).

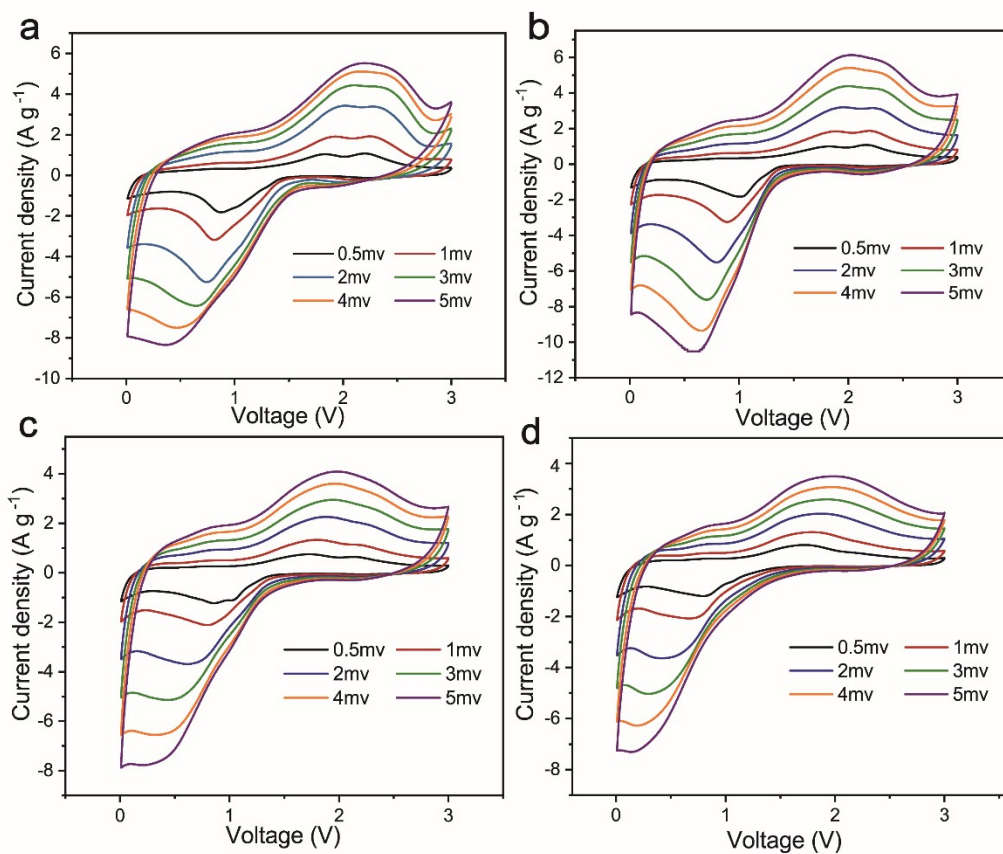

**Figure S9.** The cyclic voltammety curves of ZnO/ZnCo<sub>2</sub>O<sub>4</sub> Q-HoMS-3/1 (a), Q-HoMS-2/1 (b), Q-HoMS-1/1 (c) and Q-HoMS-1/2 (d).

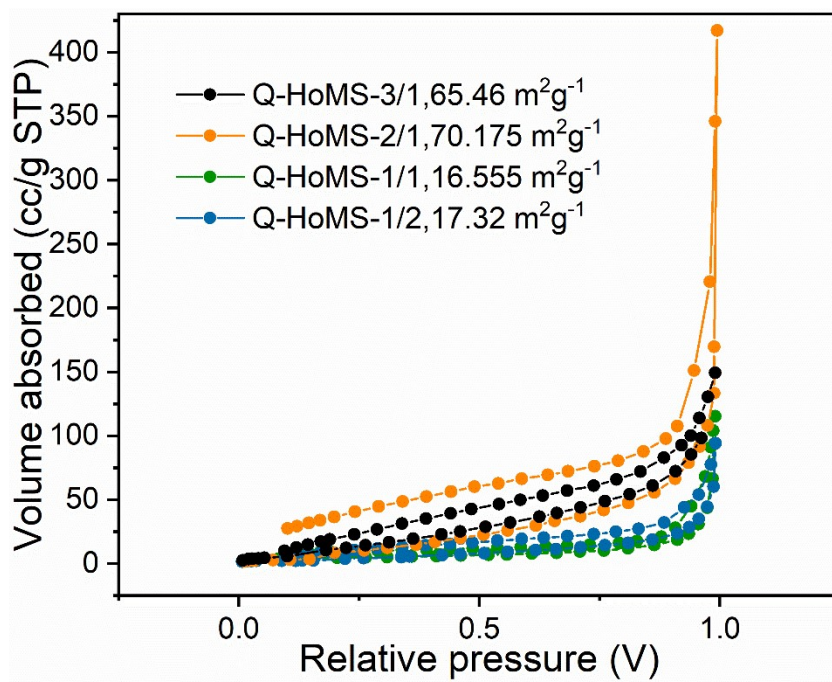

**Figure S10.** The BET curves of ZnO/ZnCo<sub>2</sub>O<sub>4</sub> Q-HoMS-3/1, Q-HoMS-2/1, Q-HoMS-1/1 and Q-HoMS-1/2.

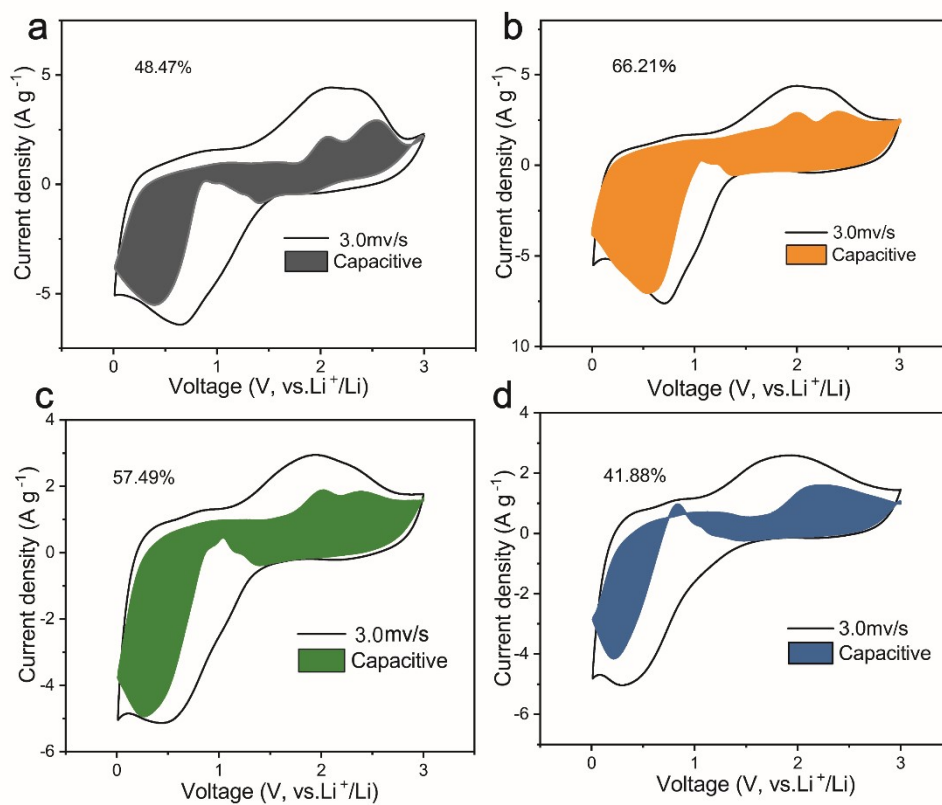

**Figure S11.** The calculation results for capacitive contribution at 3 mV s<sup>-1</sup> scan rate of ZnO/ZnCo<sub>2</sub>O<sub>4</sub> Q-HoMS-3/1 (a), Q-HoMS-2/1 (b), Q-HoMS-1/1 (c) and Q-HoMS-1/2 (d).

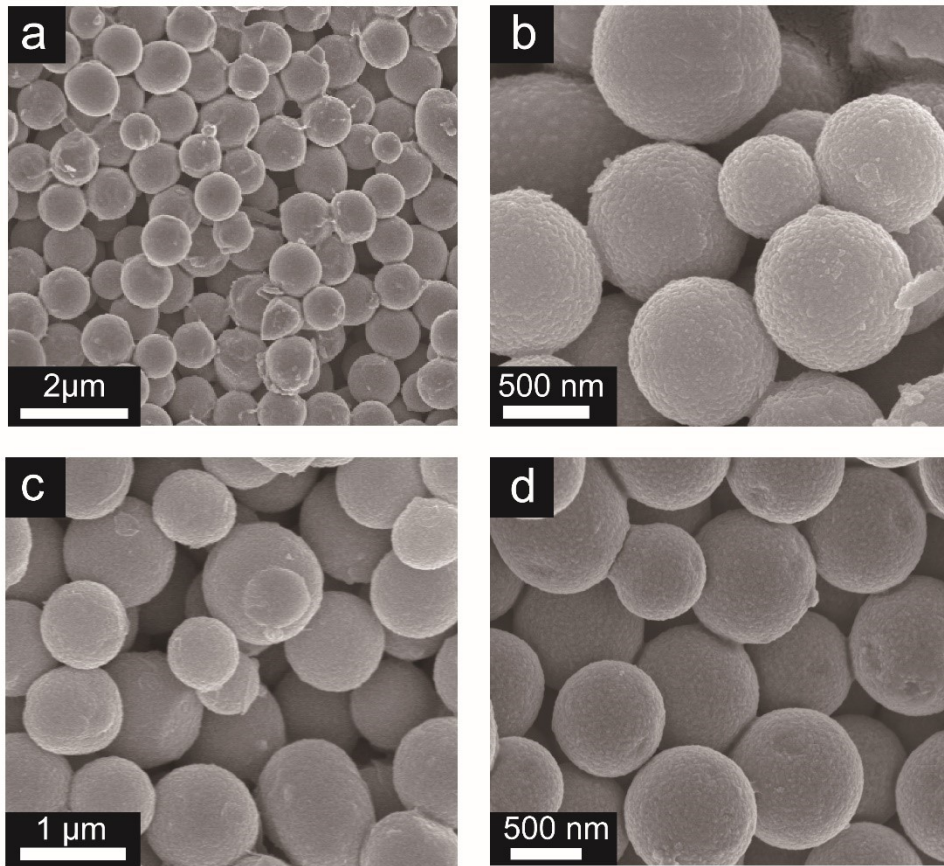

**Figure S12.** The SEM of ZnO/ZnCo<sub>2</sub>O<sub>4</sub> S-HoMS-2/1 (a), D-HoMS-2/1 (b), T-HoMS-2/1 (c) and Qa-HoMS-2/1 (d).

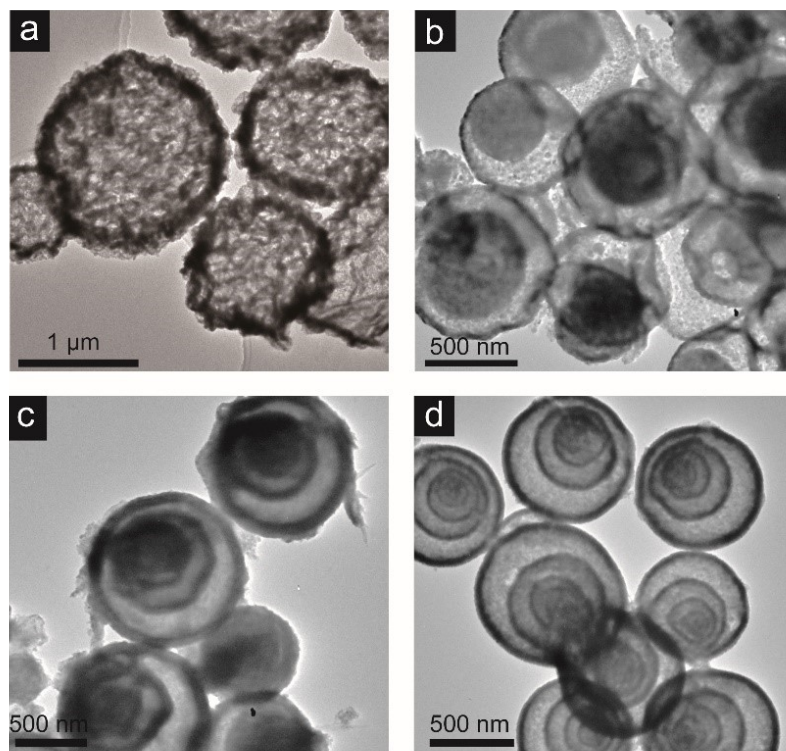

**Figure S13.** The TEM of ZnO/ZnCo<sub>2</sub>O<sub>4</sub> S-HoMS-2/1 (a), D-HoMS-2/1 (b), T-HoMS-2/1 (c) and Qa-HoMS-2/1 (d).



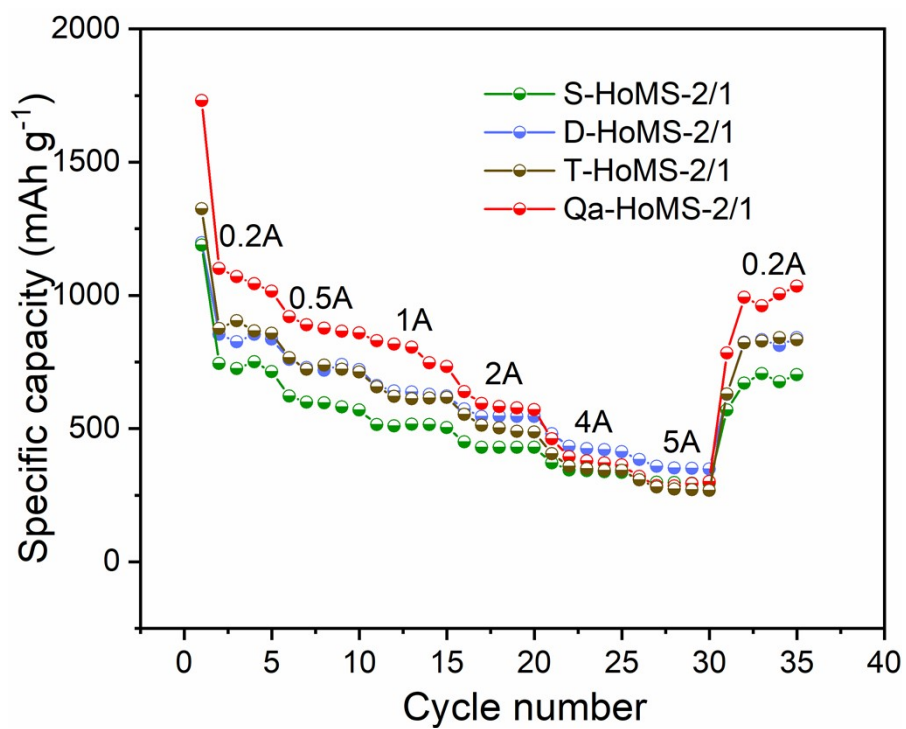

**Figure S14.** The rate capability test of ZnO/ZnCo<sub>2</sub>O<sub>4</sub> S-HoMS-2/1, D-HoMS-2/1, T-HoMS-2/1 and Qa-HoMS-2/1.

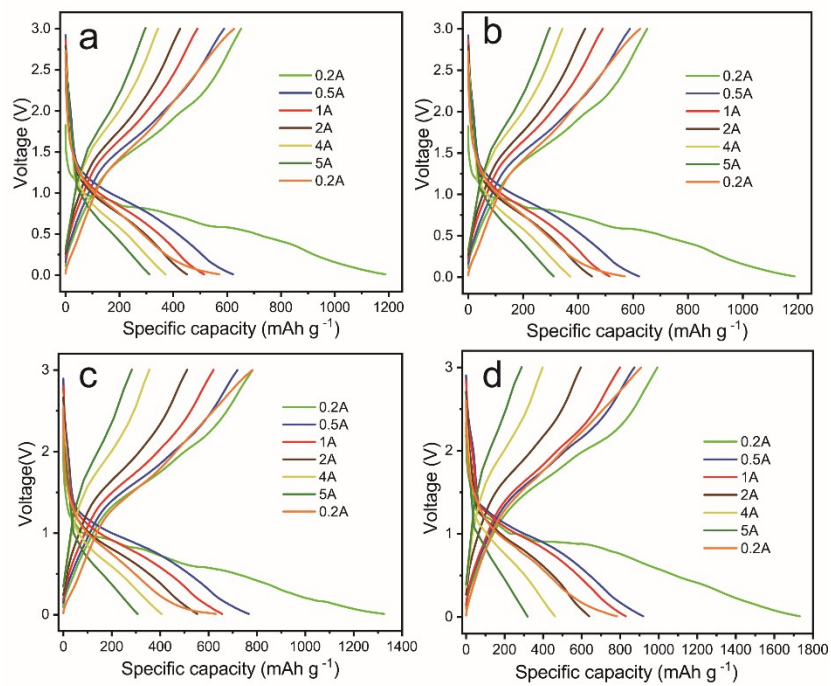

**Figure S15.** The charge-discharge curves of ZnO/ZnCo<sub>2</sub>O<sub>4</sub> S-HoMS-2/1 (a), D-HoMS-2/1 (b), T-HoMS-2/1 (c) and Qa-HoMS-2/1 (d) at different current densities.

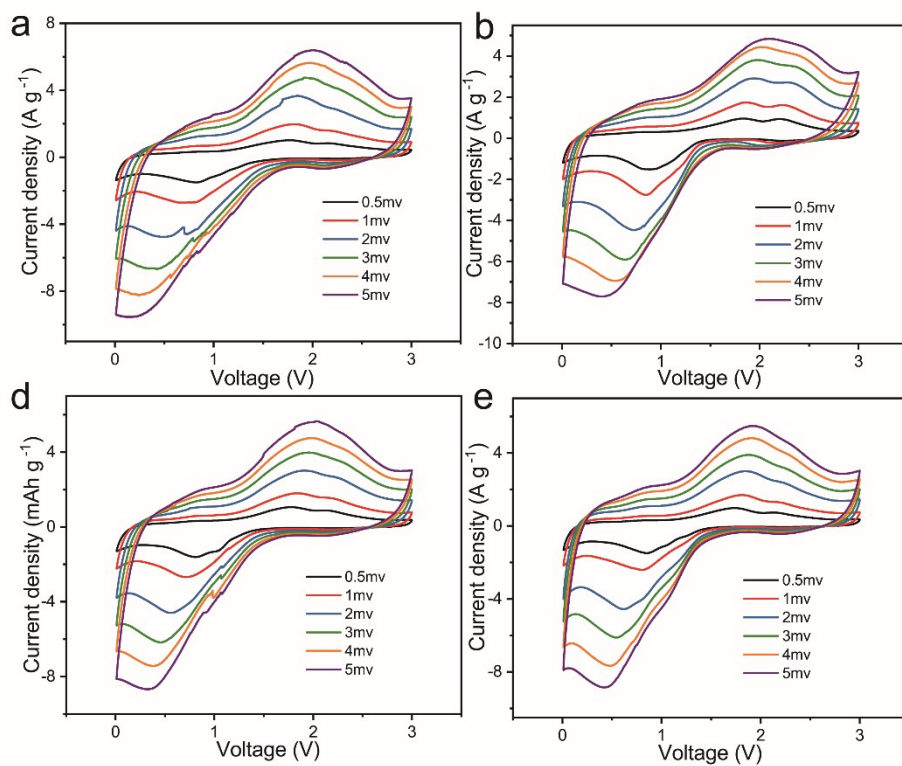

**Figure S16.** The cyclic voltammetry curves of ZnO/ZnCo<sub>2</sub>O<sub>4</sub> S-HoMS-2/1 (a), D-HoMS-2/1 (b), T-HoMS-2/1 (c) and Qa-HoMS-2/1 (d) at different scan rates.

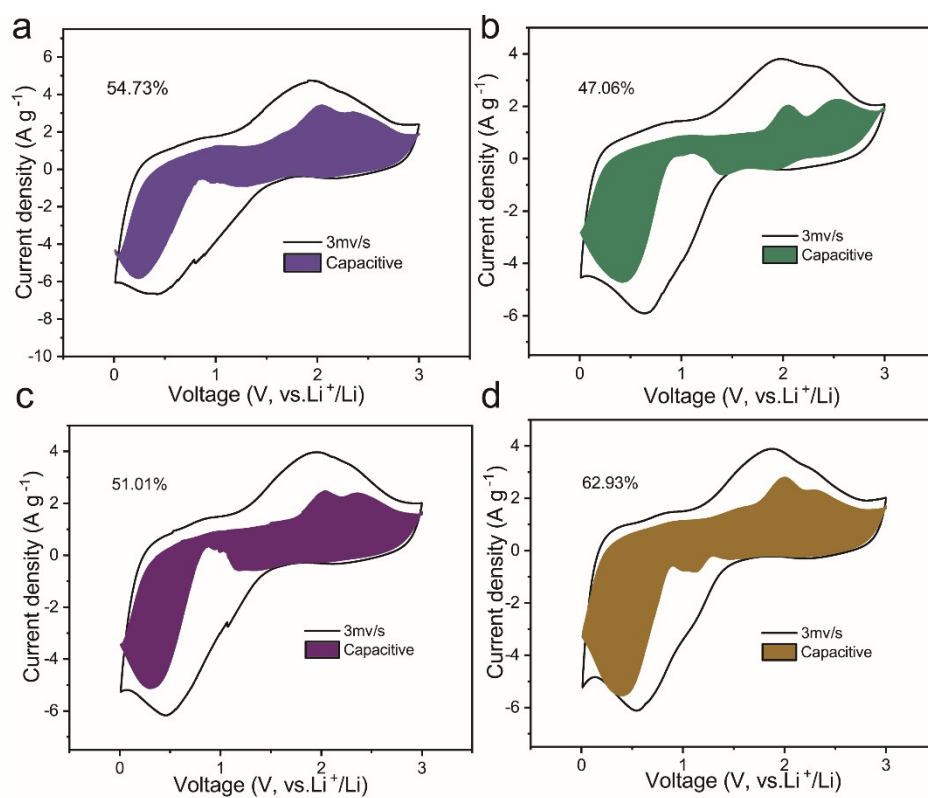

**Figure S17.** The calculation results for capacitive contribution at 3 mV s<sup>-1</sup> scan rate of ZnO/ZnCo<sub>2</sub>O<sub>4</sub> S-HoMS-2/1 (a), D-HoMS-2/1 (b), T-HoMS-2/1 (c) and Qa-HoMS-2/1 (d).

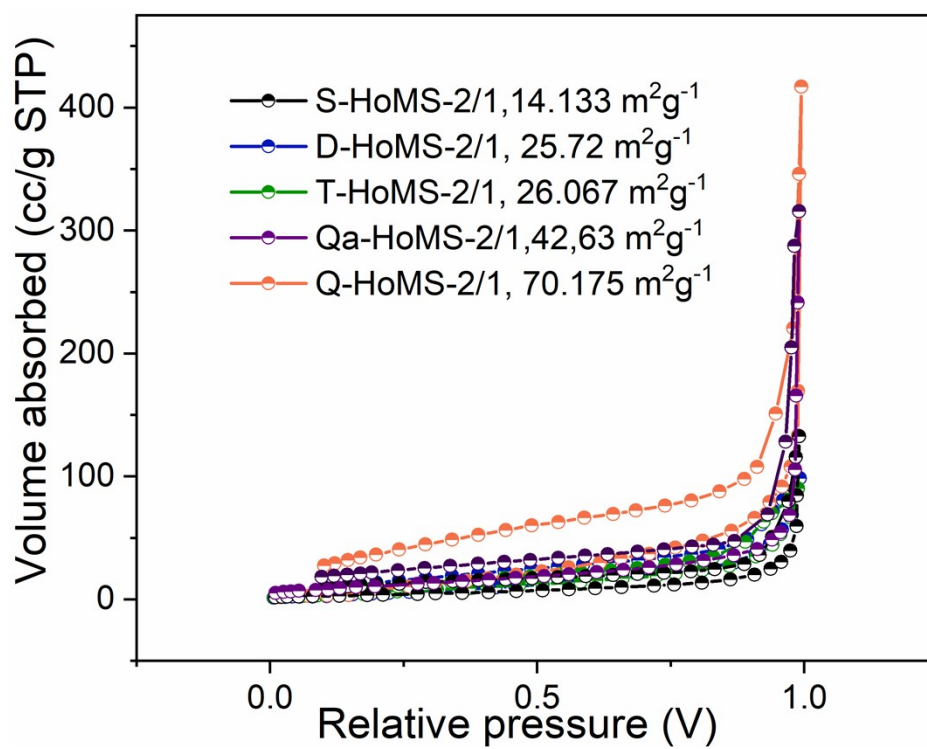

**Figure S18.** The BET curves of ZnO/ZnCo<sub>2</sub>O<sub>4</sub> S-HoMS-2/1, D-HoMS-2/1, T-HoMS-2/1, Qa-HoMS-2/1 and Q-HoMS-2/1.

**Table S1.** The mass of cobalt acetate and zinc acetate added to the reaction.

| the molar ratio of Co/Zn | Cobalt acetate (g) | Zinc acetate (g) |
|--------------------------|--------------------|------------------|
| 1v1                      | 1.49               | 1.32             |
| 1v2                      | 0.75               | 1.32             |
| 1v3                      | 0.75               | 1.98             |
| 1v4                      | 0.75               | 2.63             |
| 2v1                      | 1.49               | 0.66             |
| 3v1                      | 2.24               | 0.66             |
| 4v1                      | 2.99               | 0.66             |

**Table S2.** The preparing conditions of multi-shelled ZnO/ZnCo<sub>2</sub>O<sub>4</sub> Q-HoMS hollow spheres.

|           | temperature<br>(°C) | time<br>(h) | Molar ratio<br>of ethanol<br>to water | Heating<br>speed<br>(°C/min) | Zinc acetate<br>(g) | Cobalt acetate<br>(g) |
|-----------|---------------------|-------------|---------------------------------------|------------------------------|---------------------|-----------------------|
| Single    | 30                  | 3           | 0                                     | 1                            | 0.66                | 1.49                  |
| Double    | 30                  | 3           | 3                                     | 1                            | 0.66                | 1.49                  |
| Triple    | 30                  | 12          | 0                                     | 1                            | 0.66                | 1.49                  |
| Quadruple | 30                  | 6           | 3                                     | 1                            | 0.66                | 1.49                  |
| Quintuple | 30                  | 12          | 3                                     | 1                            | 0.66                | 1.49                  |

**Table S3.** Cell parameters and occupied positions of refined ZnCo<sub>2</sub>O<sub>4</sub>.

| type | Ref/damp | Fractional coordinates     | Mult | Occupancy |
|------|----------|----------------------------|------|-----------|
| O    | 0 0 0    | -0.12819 -0.12819 -0.12819 | 16   | 1.0000    |
| O    | 0 0 0    | 0.37819 0.37819 0.37819    | 16   | 1.0000    |
| ZN   | 0 0 0    | 0.62500 0.62500 0.62500    | 16   | 1.0000    |
| CO   | 0 0 0    | 0.25000 0.25000 0.25000    | 4    | 1.0000    |
| CO   | 0 0 0    | 0.00000 0.00000 0.00000    | 4    | 1.0000    |



**Table S4.** Cell parameters and occupied positions of refined ZnO.

| type | Ref/damp | Fractional coordinates |        |        | Mult | Occupancy |
|------|----------|------------------------|--------|--------|------|-----------|
| ZN+2 | 0 0 0    | 0.3333                 | 0.6667 | 0.0000 | 2    | 1.0000    |
| O-2  | 0 0 0    | 0.3333                 | 0.6667 | 0.3750 | 2    | 1.0000    |

**Table S5.** Two-phase proportion of ZnO and ZnCo<sub>2</sub>O<sub>4</sub> and all errors in the refined results.

| Fitted |        | -Bknd  |        |       |
|--------|--------|--------|--------|-------|
| wRp    | Rp     | wRp    | Rp     | DWd   |
| 0.0175 | 0.0134 | 0.0234 | 0.0183 | 0.477 |
| 0.0175 | 0.0134 | 0.0234 | 0.0183 | 0.477 |
